# Supplementary material
Source: PubMed Central journal article supplement (PMC2997907)
Supplement: NIHMS247962-supplement-01.pdf [file NIHMS247962-supplement-01.pdf]

## Supplementary Data

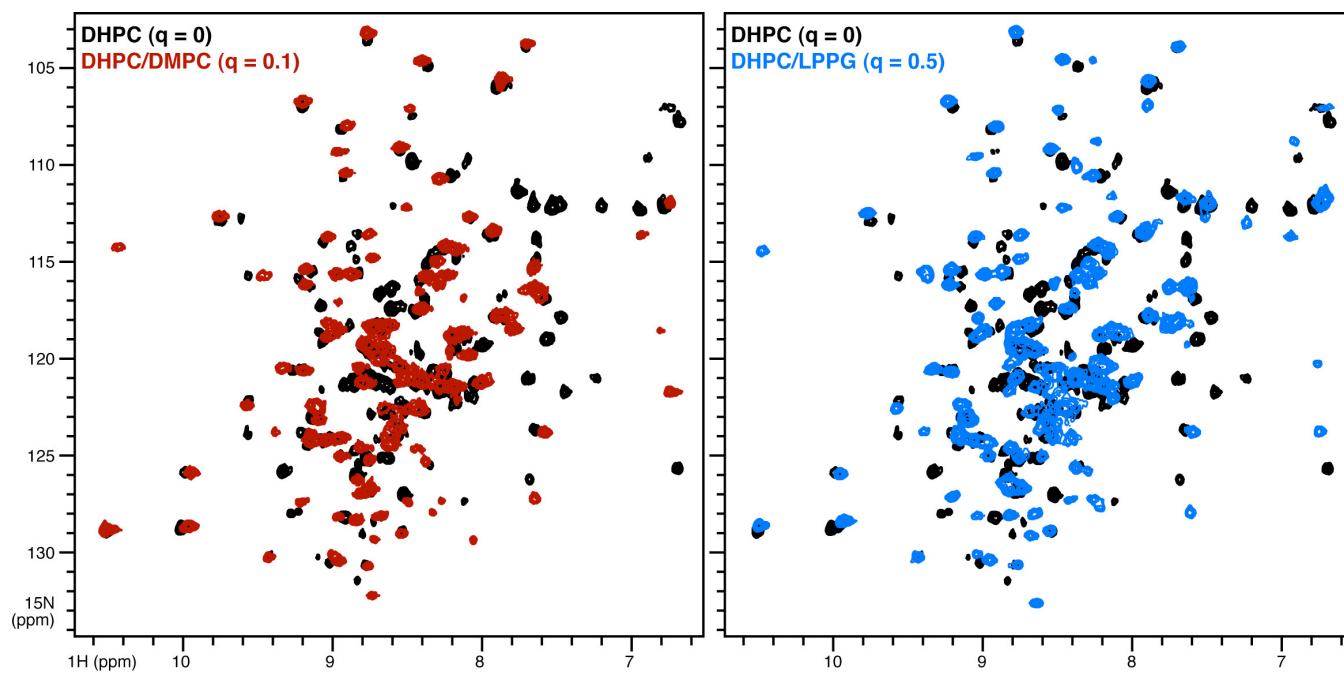

**Figure S1.** Overlay of solution NMR  $^1\text{H}/^{15}\text{N}$  HSQC spectra of uniformly  $^{15}\text{N}$  labeled Ail in 100 mM DHPC (**black**); 100 mM DHPC plus 10 mM DMPC (**red**); and 100 mM DHPC plus 50 mM LPPG (**blue**).
